# Supplementary material for: Atomic layer-by-layer construction of Pd on nanoporous gold via underpotential deposition and displacement reaction
Source: Royal Society of Chemistry journal article supplement (doi:10.1039/c4ra17014h), 2015-01-01
Supplement: c4ra17014h1.pdf [file c4ra17014h1.pdf]

**Electronic Supplementary Information (ESI):**

**Atomic layer-by-layer construction of Pd on nanoporous gold  
via underpotential deposition and displacement reaction**

Xuejiao Yan,<sup>a,†</sup> Haiyan Xiong,<sup>b,†</sup> Qingguo Bai,<sup>a</sup> Jan Frenzel,<sup>c</sup> Conghui Si,<sup>a</sup> Xiaoting  
Chen,<sup>a</sup> Gunther Eggeler<sup>c</sup> and Zhonghua Zhang<sup>a\*</sup>

*<sup>a</sup>Key Laboratory for Liquid-Solid Structural Evolution and Processing of Materials  
(Ministry of Education), School of Materials Science and Engineering, Shandong  
University, Jingshi Road 17923, Jinan, 250061, P.R. China*

*<sup>b</sup>Center for Advanced Energy Materials & Technology Research (AEMT),  
and School of Chemistry and Chemical Engineering, Shandong University, Jinan  
250100, China*

*<sup>c</sup>Institut für Werkstoffe, Ruhr Universität Bochum, Bochum 44780, Germany*

To whom correspondence should be addressed: [zh\\_zhang@sdu.edu.cn](mailto:zh_zhang@sdu.edu.cn)

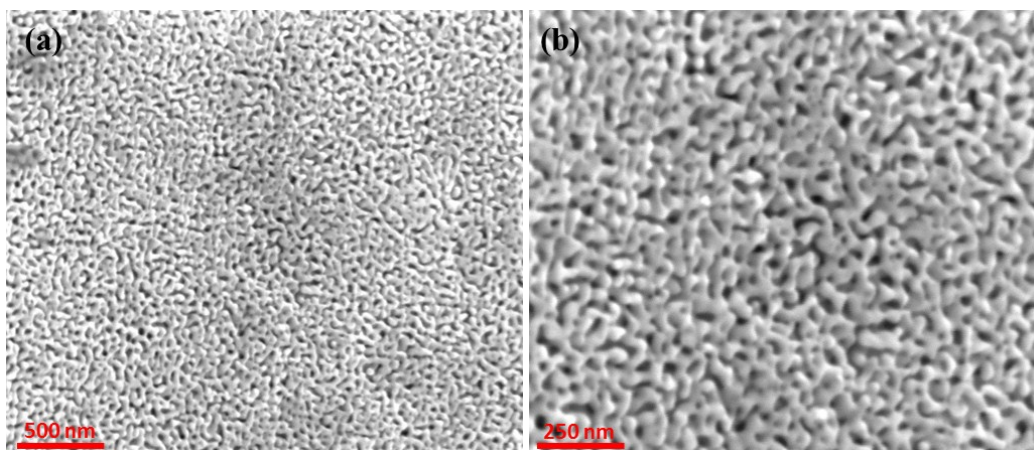

**Fig. S1.** (a, b) SEM images of the NPG-Pd5 film with different magnification.

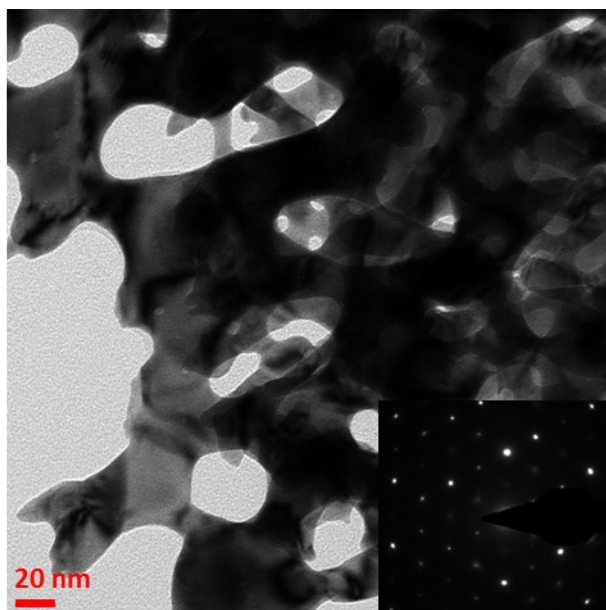

**Fig. S2.** TEM image of NPG-Pd4 film. (Inset) Corresponding SAED pattern.

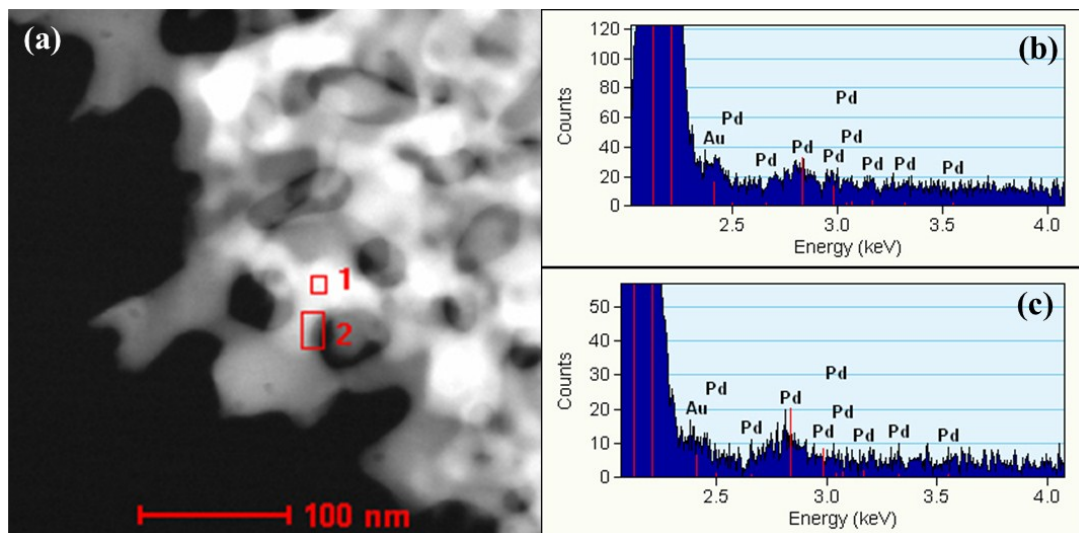

**Fig. S3.** (a) STEM image of NPG-Pd4; (b, c) EDX spectra corresponding to the marked areas by square 1 and square 2.

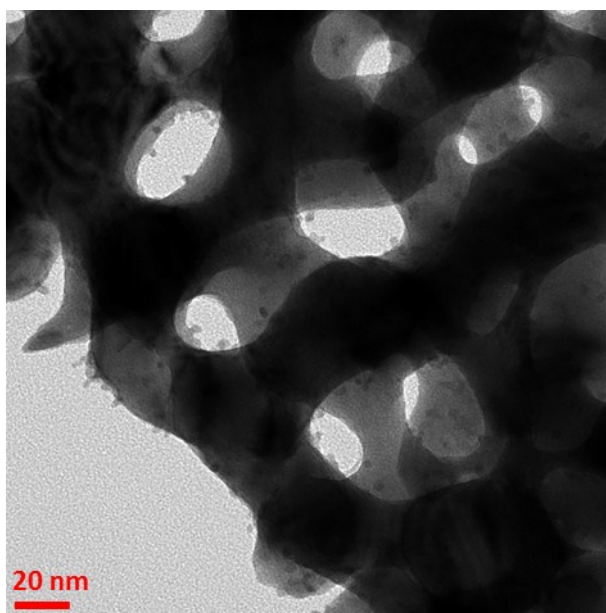

**Fig. S4.** TEM image of NPG-Pt1 film.

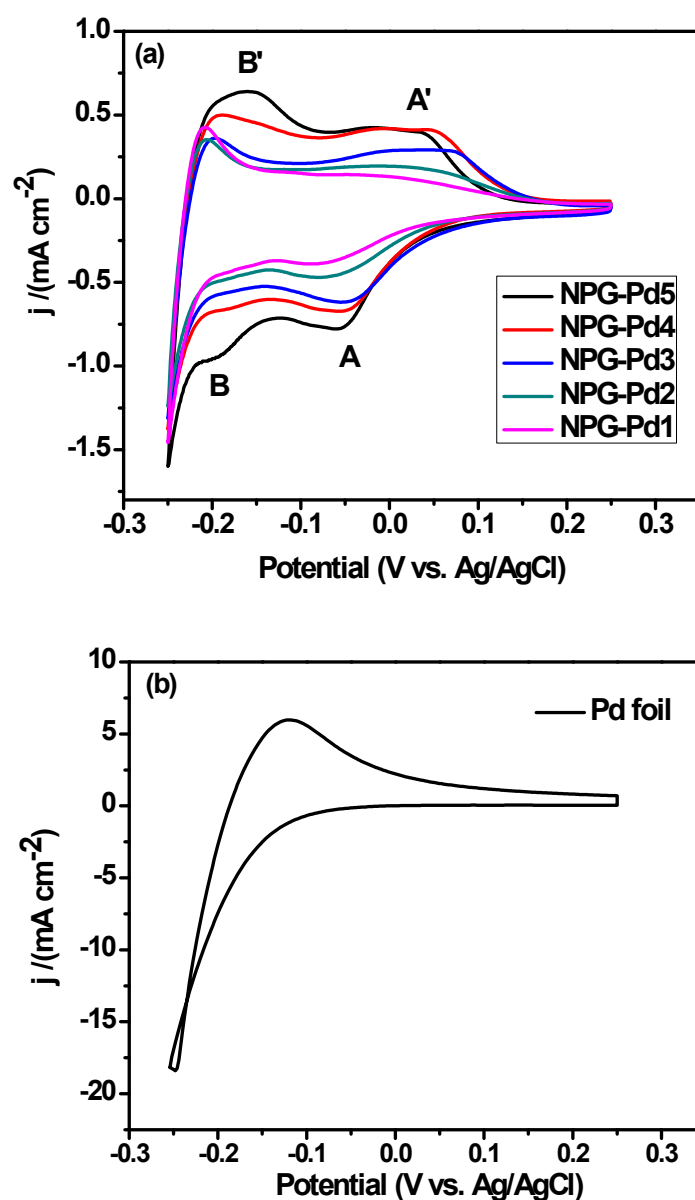

**Fig. S5.** (a) CVs of NPG-Pdx electrodes in the 0.5 M H<sub>2</sub>SO<sub>4</sub> solution at the scan rate of 50 mV/s. (b) CV of Pd foil in the same solution. (Current densities are normalized by geometric area)
